# Supplementary material
Source: PubMed Central journal article supplement (PMC4857710)
Supplement: NIHMS778146-supplement-Supplemental_materials.pdf [file NIHMS778146-supplement-Supplemental_materials.pdf]

**Supplemental Digital Content 1.** Transfusion-Associated Circulatory Overload Screening Algorithm

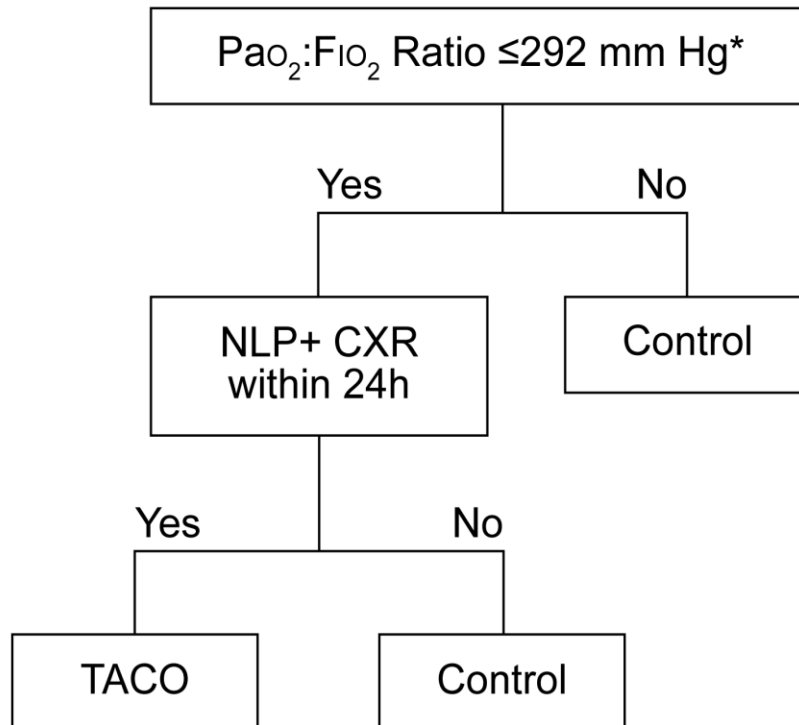

This is the natural language processing (NLP)–based transfusion-associated circulatory overload (TACO) screening algorithm used to identify patients with a high likelihood of preoperative TACO. Patients were screened in, then underwent manual review to verify whether TACO was indeed present. Asterisk indicates that, in the absence of a PaO<sub>2</sub>:FIO<sub>2</sub> ratio, surrogate markers of hypoxemia used in order of availability were PaO<sub>2</sub> ≤117 mm Hg; SpO<sub>2</sub> ≤97%; and respiratory rate ≥17 per minute. CXR = chest radiograph; h = hours; plus sign (+) = positive.
